# Supplementary material for: Acid–base-controlled and dibenzylammonium-assisted aggregation induced emission enhancement of poly(tetraphenylethene) with an impressive blue shift
Source: Royal Society of Chemistry journal article supplement (doi:10.1039/c6py00275g), 2016-01-01
Supplement: c6py00275g1.pdf [file c6py00275g1.pdf]

Electronic Supplementary Information

**Acid-base-controlled and dibenzylammonium-assisted aggregation  
induced emission enhancement of poly(tetraphenylethene) with an  
impressive blue shift**

Lipeng He, Lijie Li, Xiaoning Liu, Jun Wang, Huanting Huang and Weifeng Bu\*

*Key Laboratory of Nonferrous Metals Chemistry and Resources Utilization of Gansu Province,  
State Key Laboratory of Applied Organic Chemistry, and College of Chemistry and Chemical  
Engineering, Lanzhou University, Lanzhou City, Gansu Province, China, E-mail: buwf@lzu.edu.cn*

**Additional data**

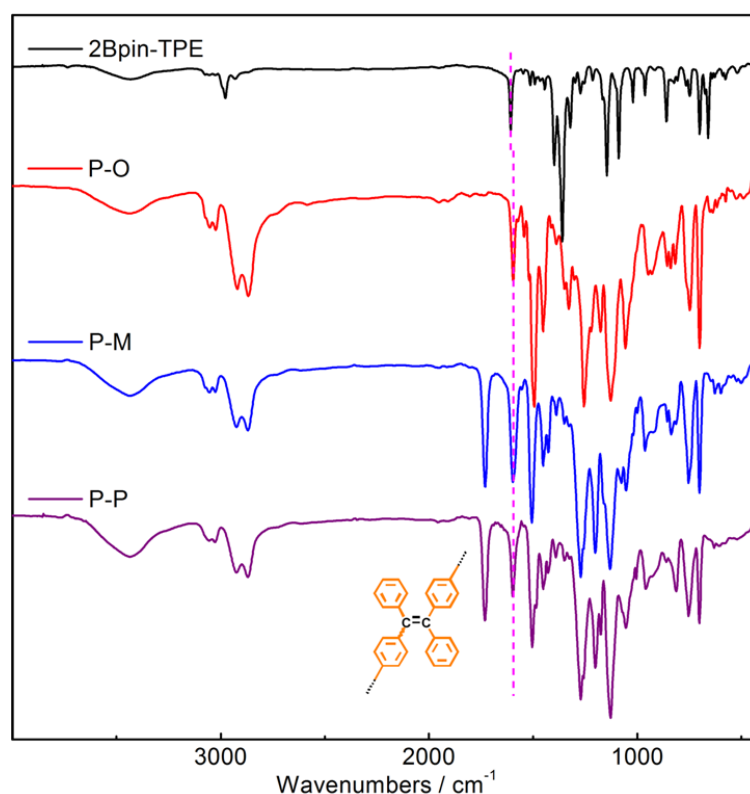

**Fig. S1** Infrared spectra of 2Bpin-TPE, P-O, P-M and P-P.

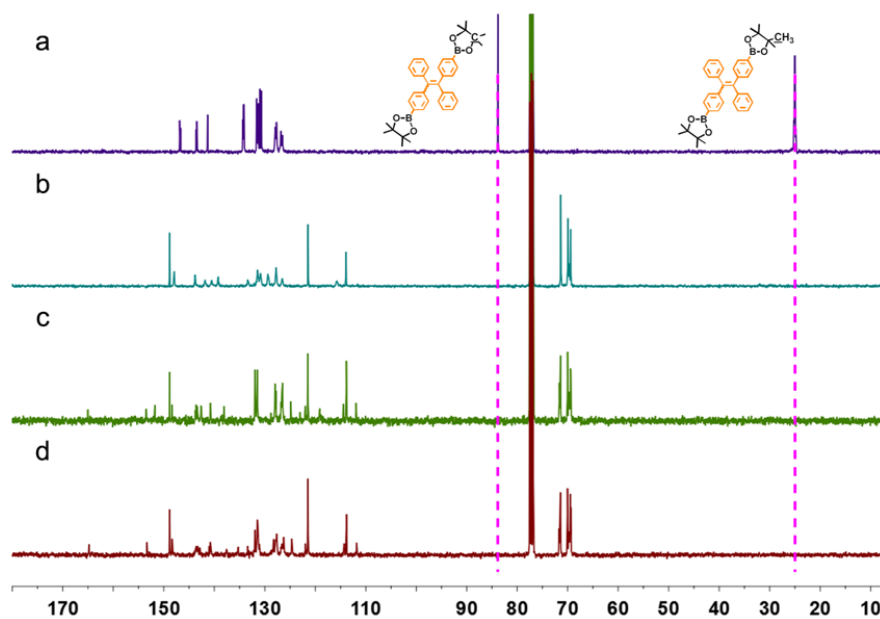

**Fig. S2**  $^{13}\text{C}$  NMR spectra of 2Bpin-TPE, P-O, P-M and P-P.

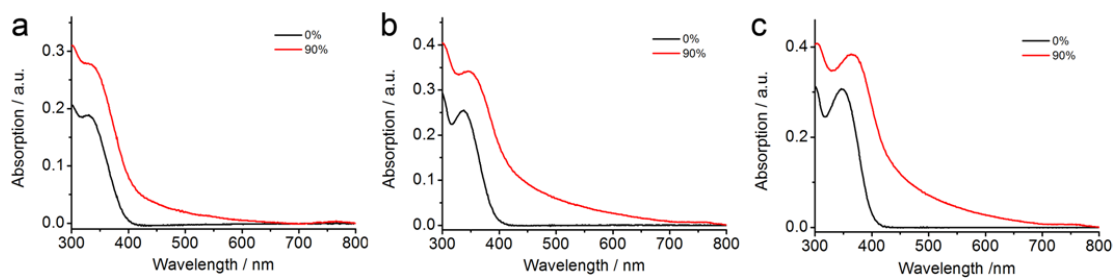

**Fig. S3** Absorption spectra of P-O (a), P-M (b) and P-P (c) in the THF/water mixture solvents with 0% and 90% water content.

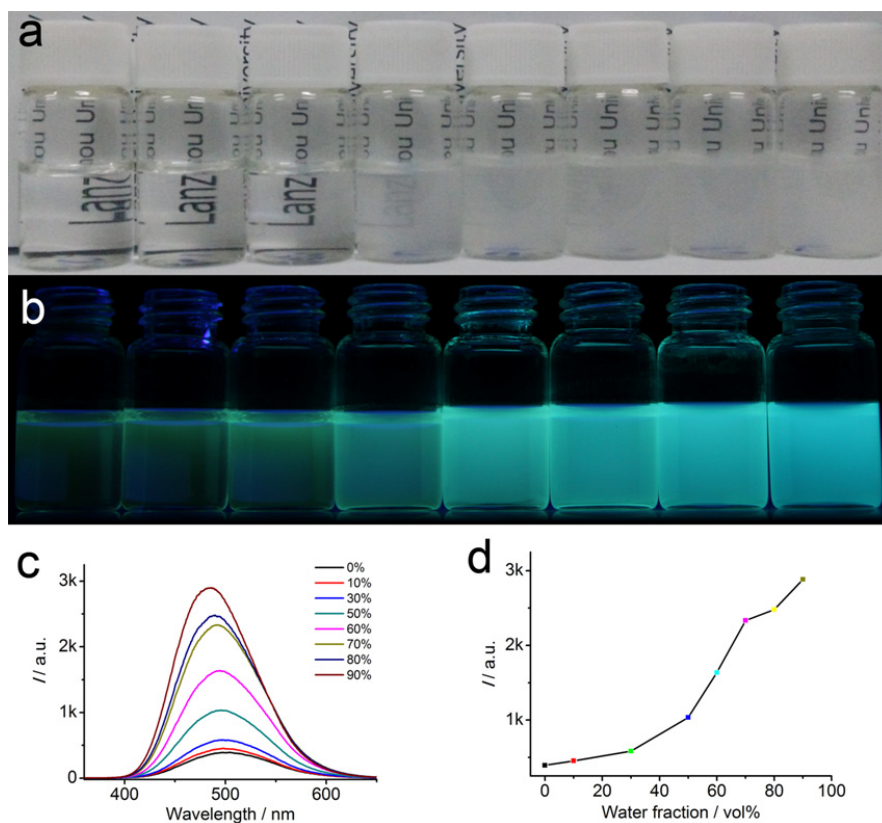

**Fig. S4** Photographs of **P-O** in THF-Water mixture solvents with different fractions of water under ambient light (a) and UV irradiation (b). Photoluminescence spectra (c) and the plot of emission intensity (d) of **P-O** in THF-Water mixture solvents. The concentration was 100  $\mu\text{M}$ .

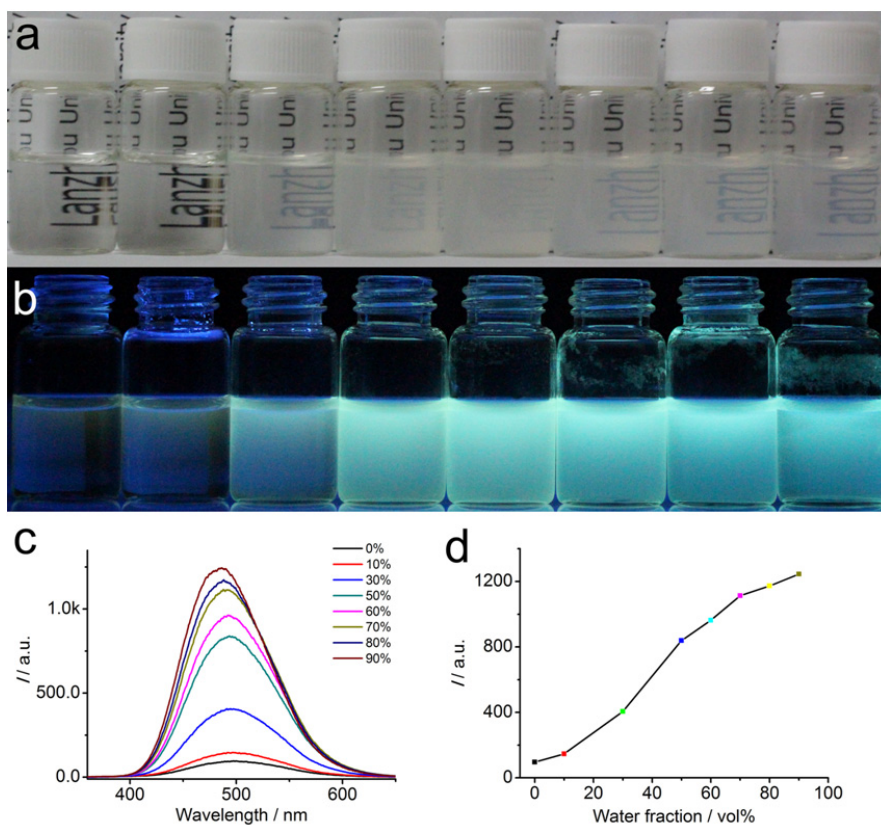

**Fig. S5** Photographs of **P-M** in THF-Water mixture solvents with different fractions of water under ambient light (a) and UV irradiation (b). Photoluminescence spectra (c) and the plot of emission intensity (d) of **P-M** in THF-Water mixture solvents. The concentration was 100  $\mu\text{M}$ .

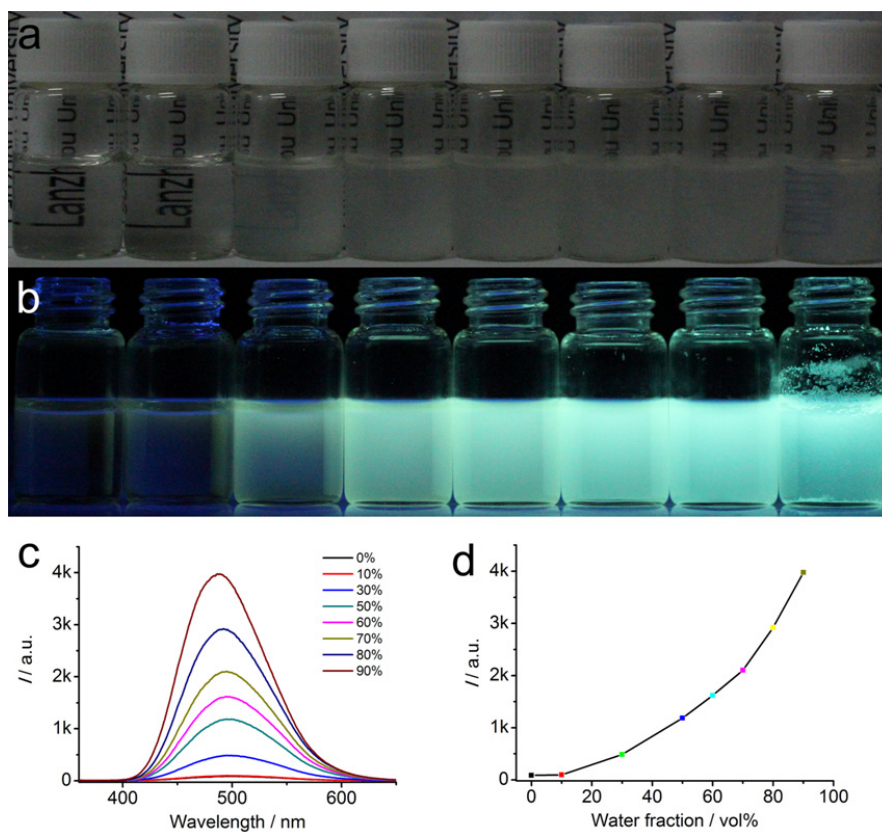

**Fig. S6** Photographs of **P-P** in THF-Water mixture solvents with different fractions of water under ambient light (a) and UV irradiation (b). Photoluminescence spectra (c) and the plot of emission intensity (d) of **P-P** in THF-Water mixture solvents. The concentration was 100  $\mu$ M.

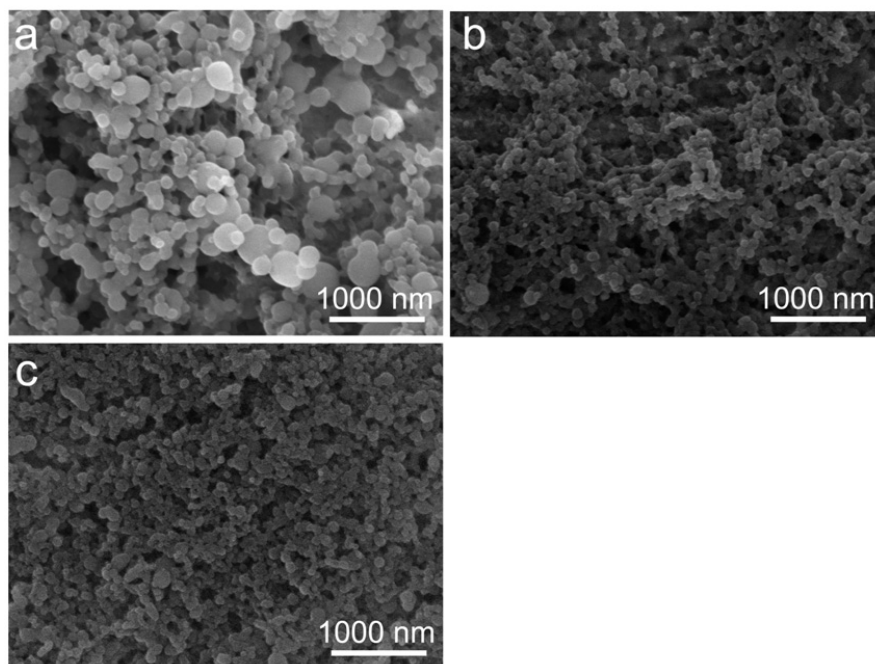

**Fig. S7** SEM images of **P-O** (b), **P-M** (c) and **P-P** (d) in the THF-Water mixture solvent with 90% water content. The concentration was 100  $\mu\text{M}$

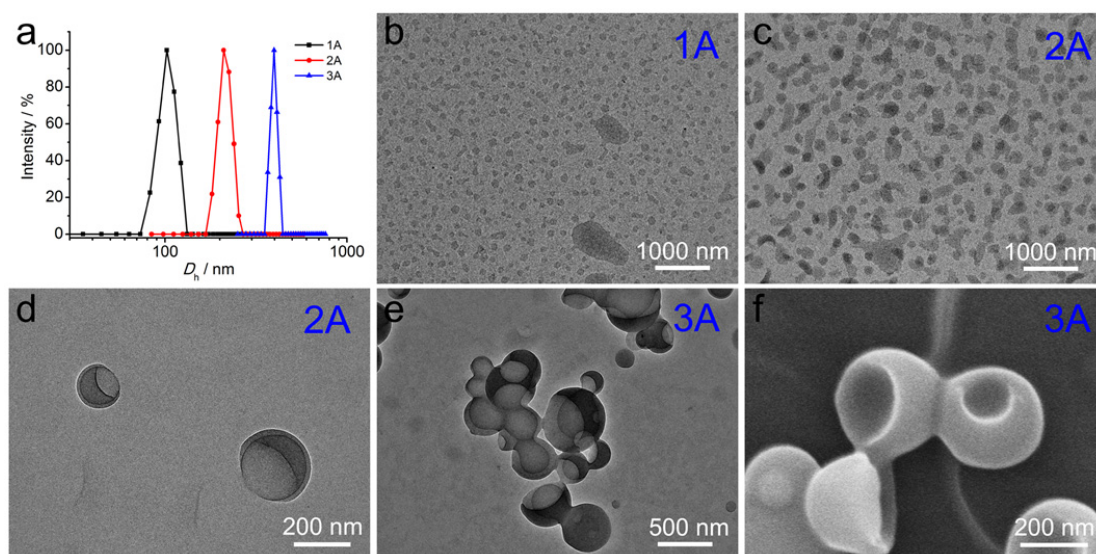

**Fig. S8** DLS plot (a), TEM and SEM images (b-i) of **P-O/C12-2** in THF solution after the first, second and third acidification.



## Synthesis

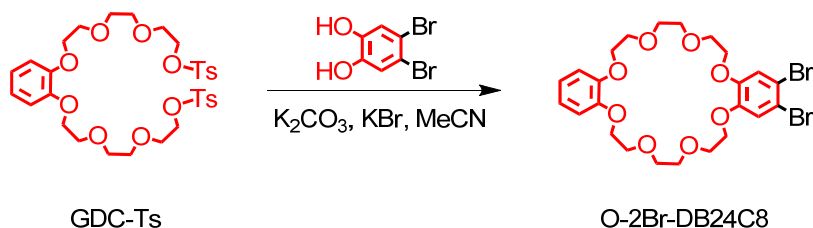

**Scheme S1** Synthesis of **O-2Br-DB24C8**.

### **O-2Br-DB24C8:**

Into a 500 mL Schlenk tube were added 4,5-dibromobenzene-1,2-diol (535.8 mg, 2 mmol),  $K_2CO_3$  (1.1 g, 8 mmol) and catalytic amount of KBr. The tube was degassed with Ar and 250 mL MeCN was added. The mixture was stirred at reflux for 30 min. After the temperature was cooled to room temperature, GDC-Ts (1.366 g, 2 mmol) dissolved in 50 mL MeCN was injected into the tube. The mixture was stirred at reflux for two days. The formed solid was removed by filtration and washed with ethyl acetate. The crude product was purified by column chromatography (silica gel) using ethyl acetate as eluent to give a white solid in 88% yield.  $^1H$  NMR (400 MHz,  $CDCl_3$ ,  $\delta$ ), 7.06 (s, 2H), 6.88 (m, 4H), 4.10 (m, 8H), 3.90 (m, 8H), 3.81 [m, 8H].  $^{13}C$  NMR (100 MHz,  $CDCl_3$ ,  $\delta$ ), 148.91, 148.81, 121.50, 118.17, 115.23, 113.95, 77.48, 77.16, 76.84, 71.52, 71.40, 70.04, 69.88, 69.70, 69.43. HR-ESI-MS ( $m/z$ ),  $[M+Na]^+$  calculated: 629.0179, found: 629.0173, Error = 1.0 ppm.

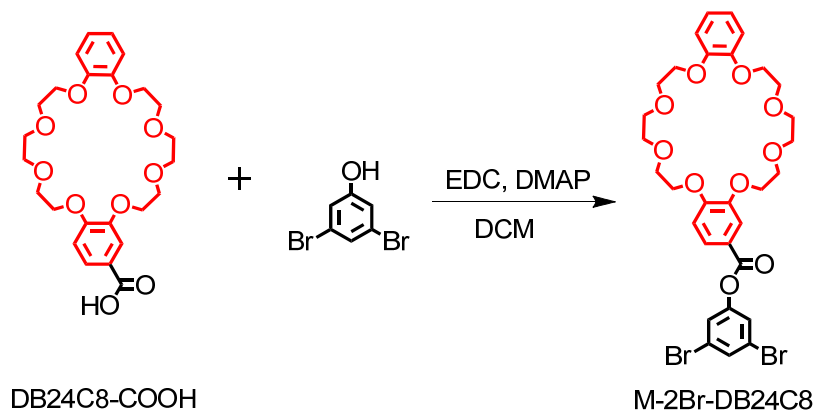

**Scheme S2** Synthesis of **M-2Br-DB24C8**.

### **M-2Br-DB24C8:**

Into a 100 mL a round-bottomed flask were added DB24C8-COOH (1 mmol), EDC (2 mmol), DMAP (1 mmol) and DCM (30 mL). The mixture was stirred in an ice-bath for 15 min, then 3,5-dibromophenol (1 mmol) was slowly added. The reaction mixture was warmed to room temperature





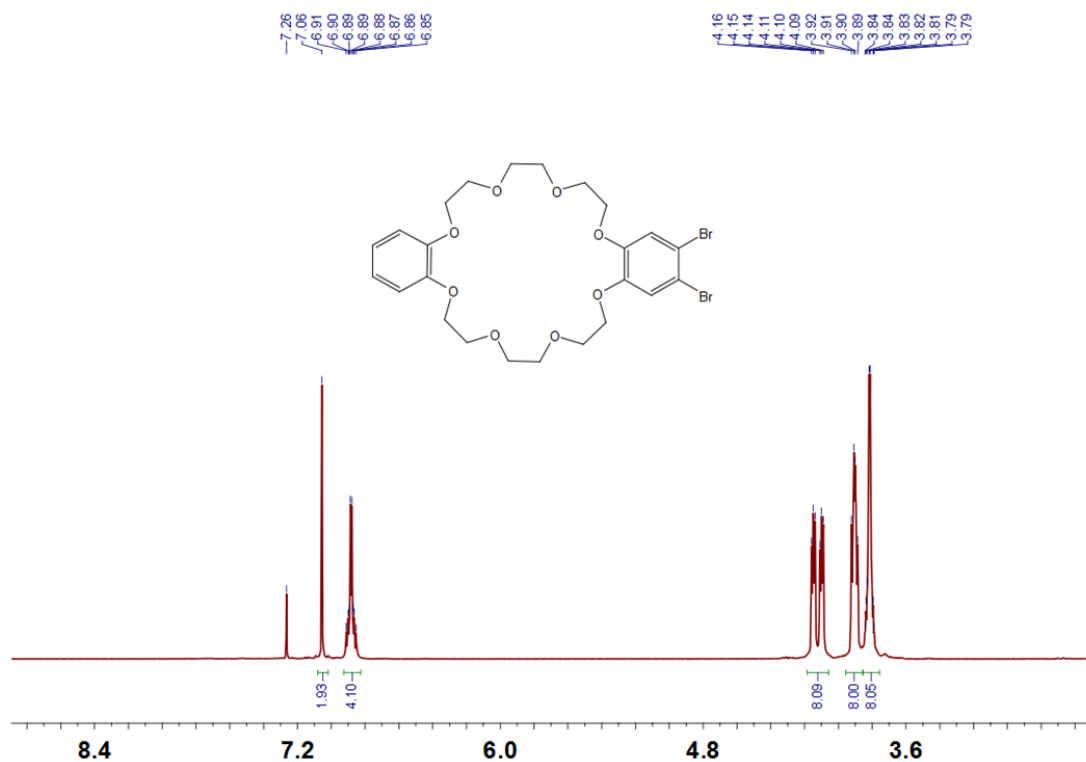

Fig. S9  $^1\text{H}$  NMR spectrum of O-2Br-DB24C8.

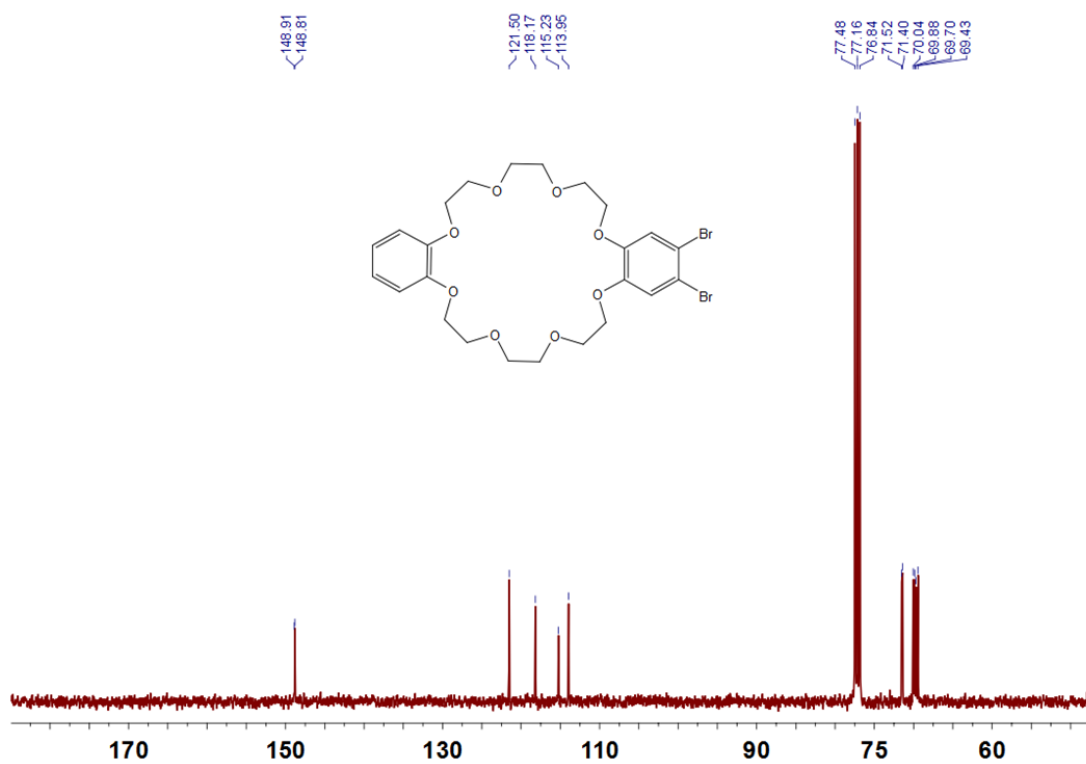

Fig. S10  $^{13}\text{C}$  NMR spectrum of O-2Br-DB24C8.

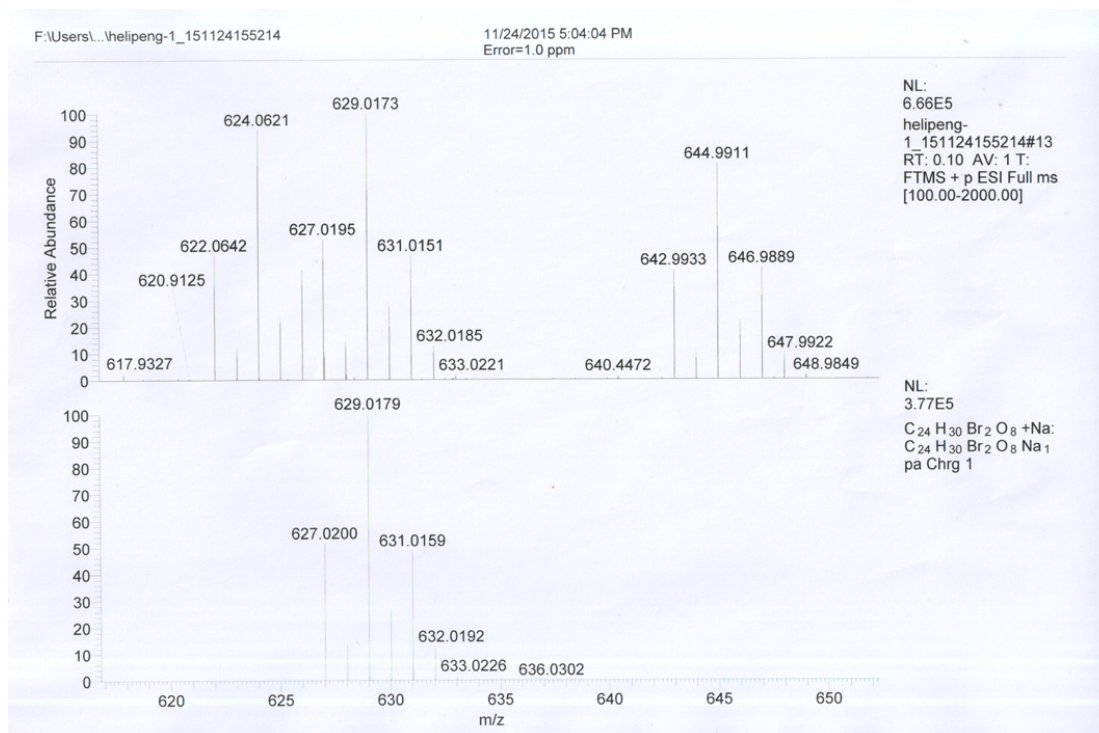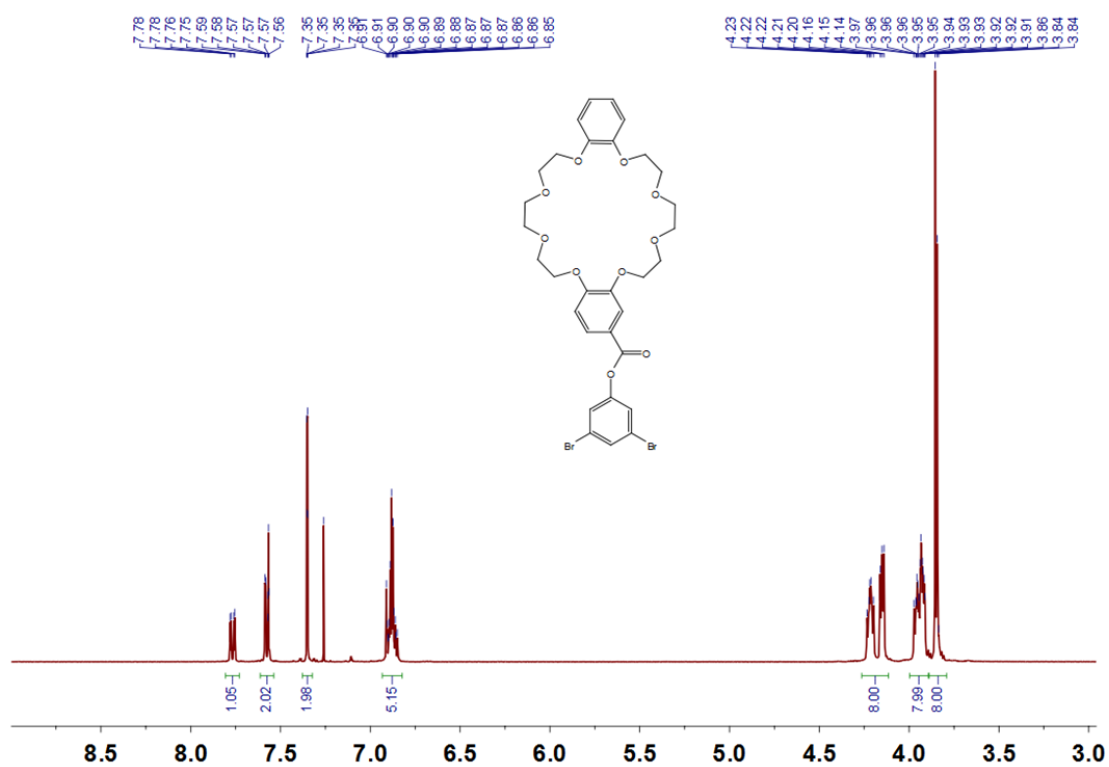

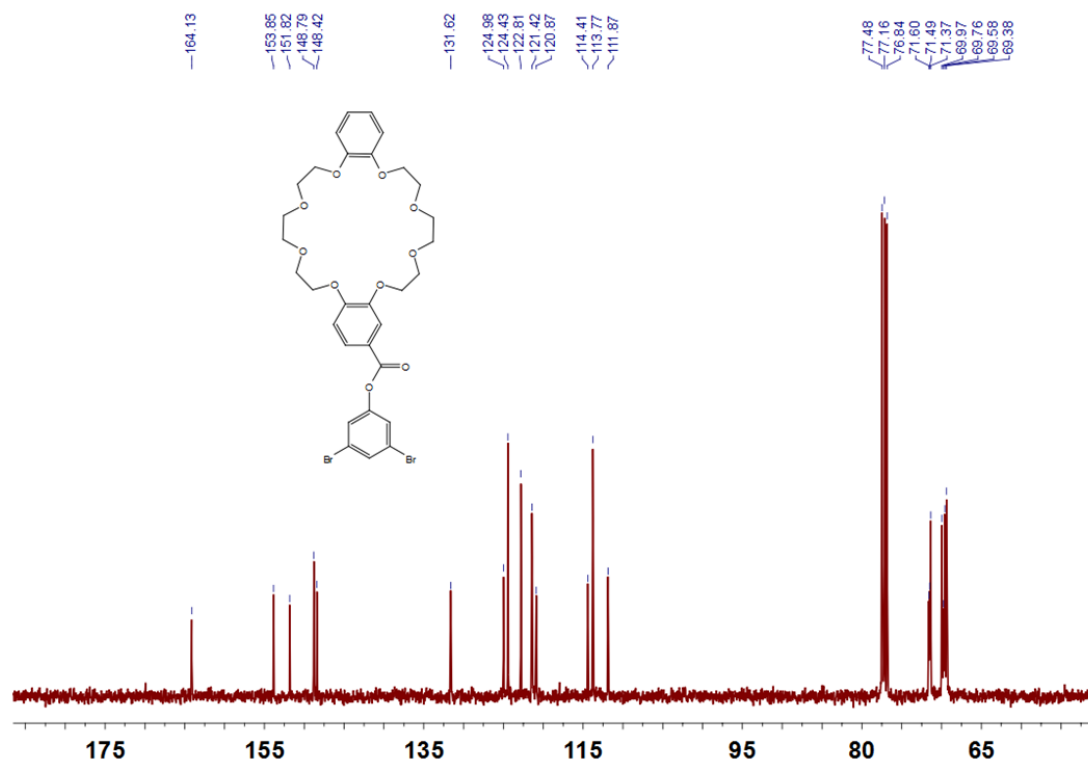

Fig. S13  $^{13}\text{C}$  NMR spectrum of M-2Br-DB24C8.

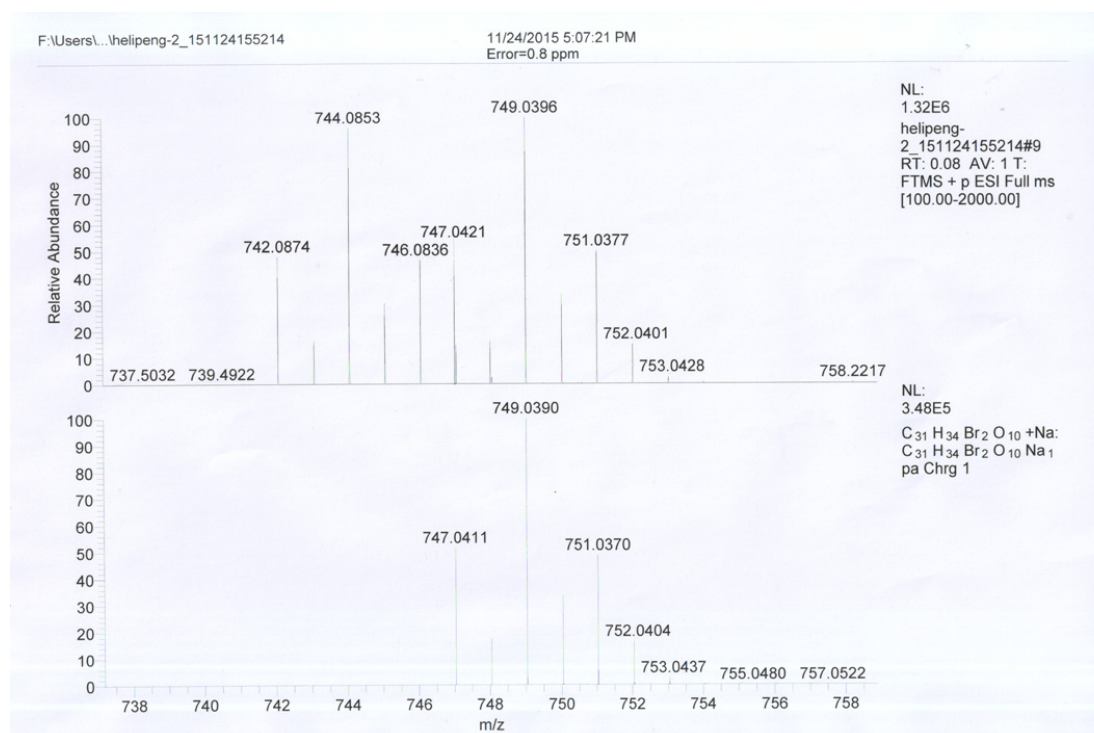

Fig. S14 HR-ESI-MS spectrum of M-2Br-DB24C8.

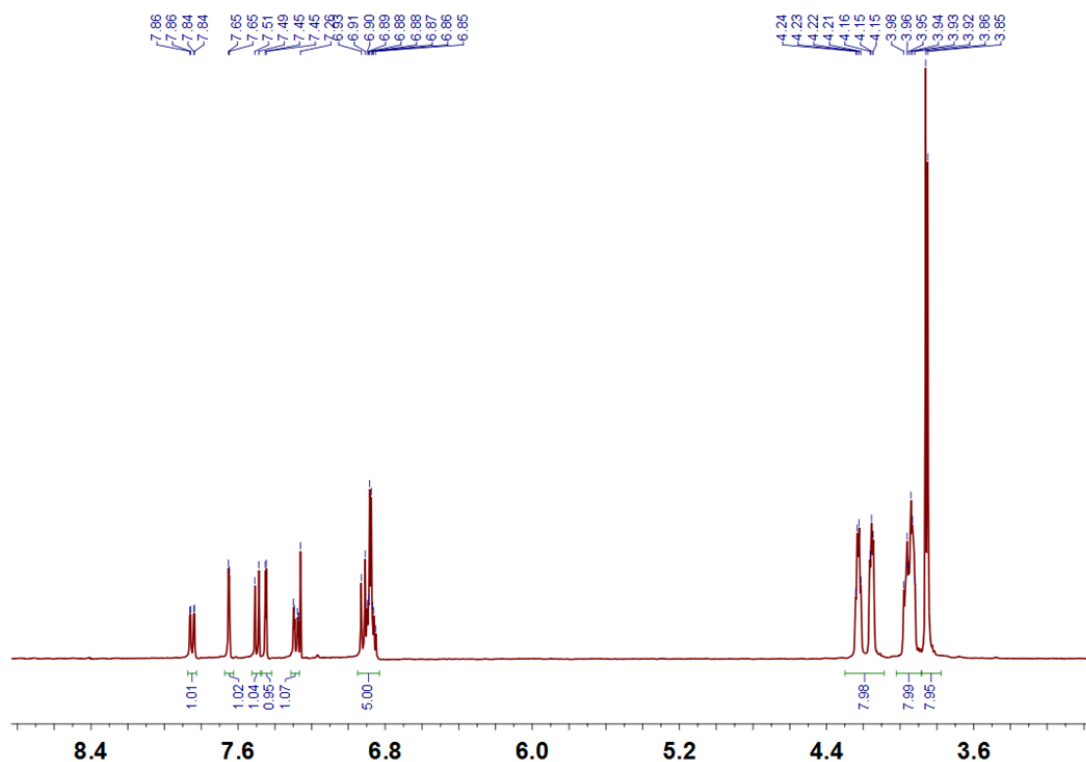

Fig. S15 <sup>1</sup>H NMR spectrum of P-2Br-DB24C8.

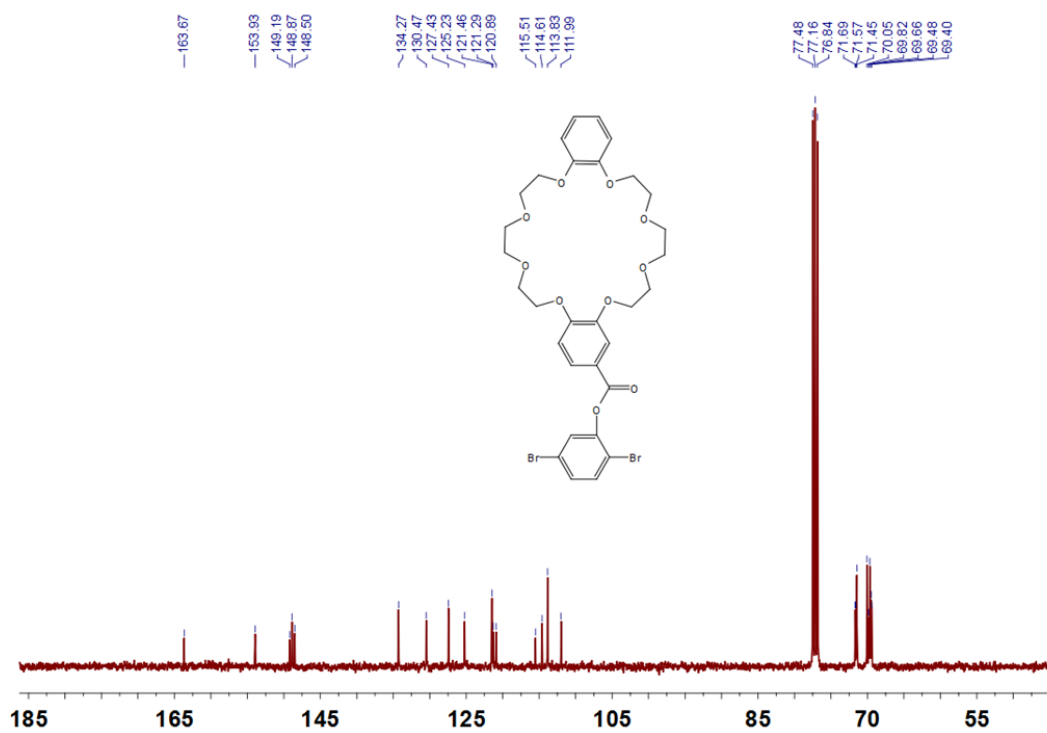

Fig. S16 <sup>13</sup>C NMR spectrum of P-2Br-DB24C8.

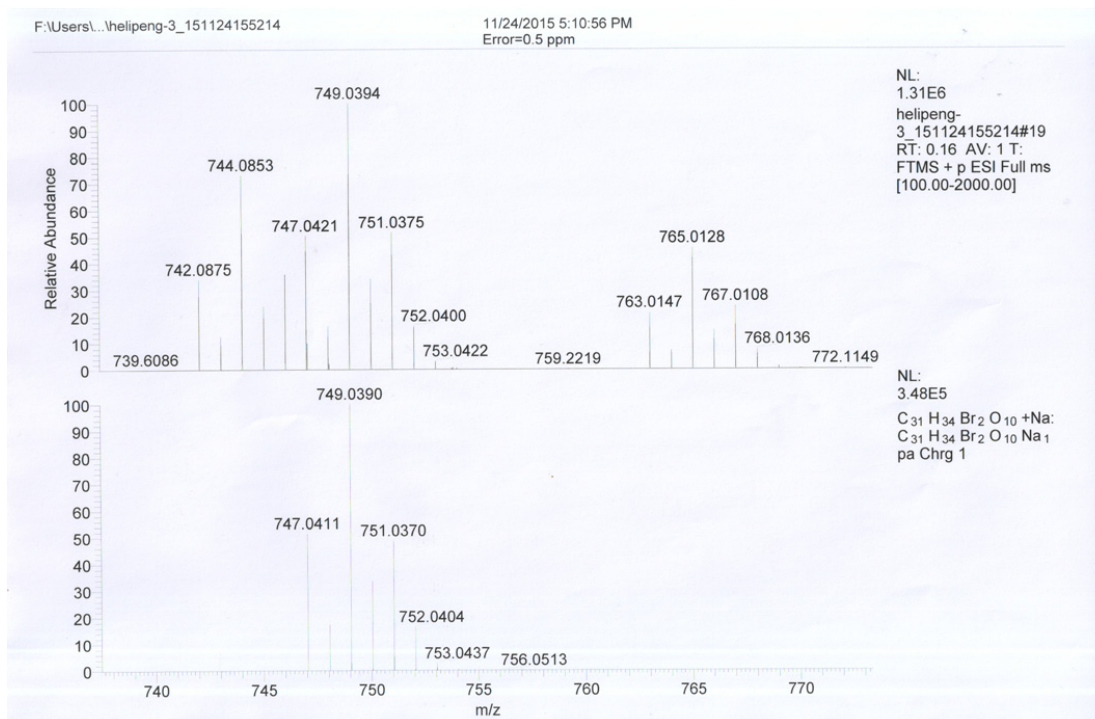

**Fig. S17** HR-ESI-MS spectrum of **P-2Br-DB24C8**.
